# Supplementary figures and images for: Neighbouring-group composition and within-group relatedness drive extra-group paternity rate in the European badger (Meles meles)
Source: PubMed Central journal article supplement — J Evol Biol. 2014 Sep 18;27(10):2191–203. doi: 10.1111/jeb.12473 (PMC4283041; doi:10.1111/jeb.12473), 2014-09-18

**EGO**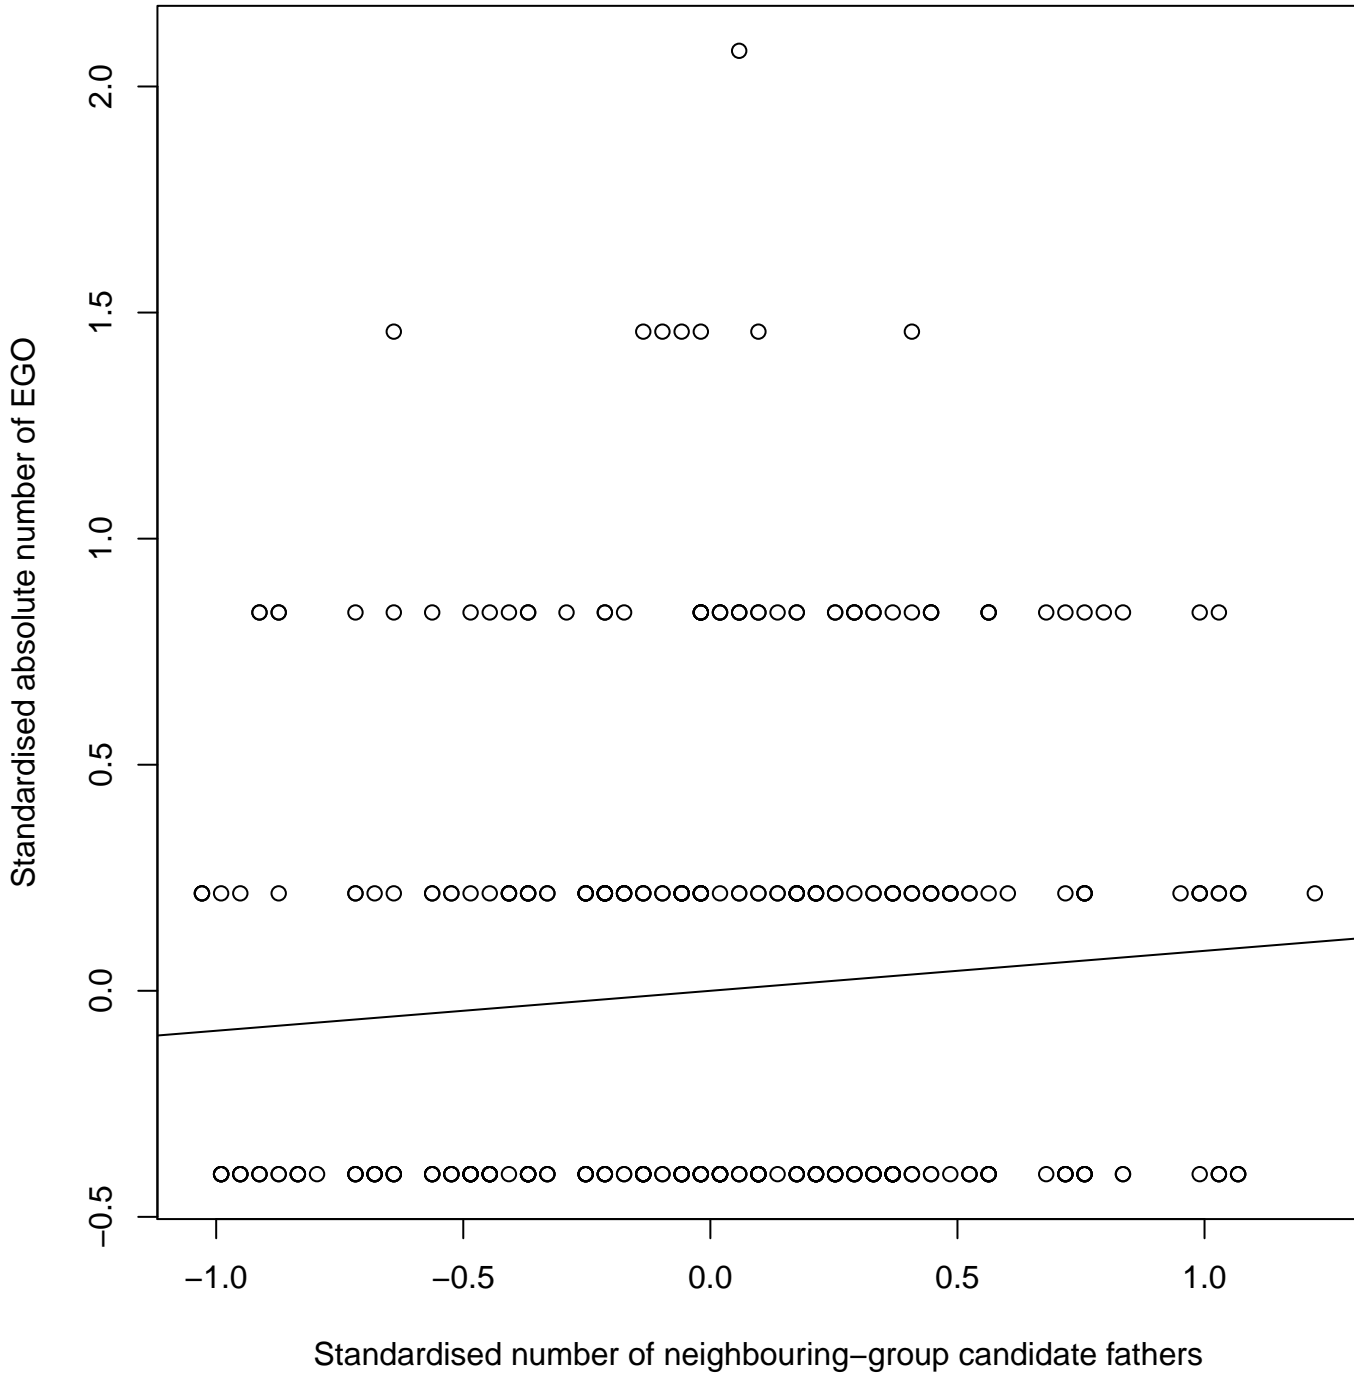**EGMP**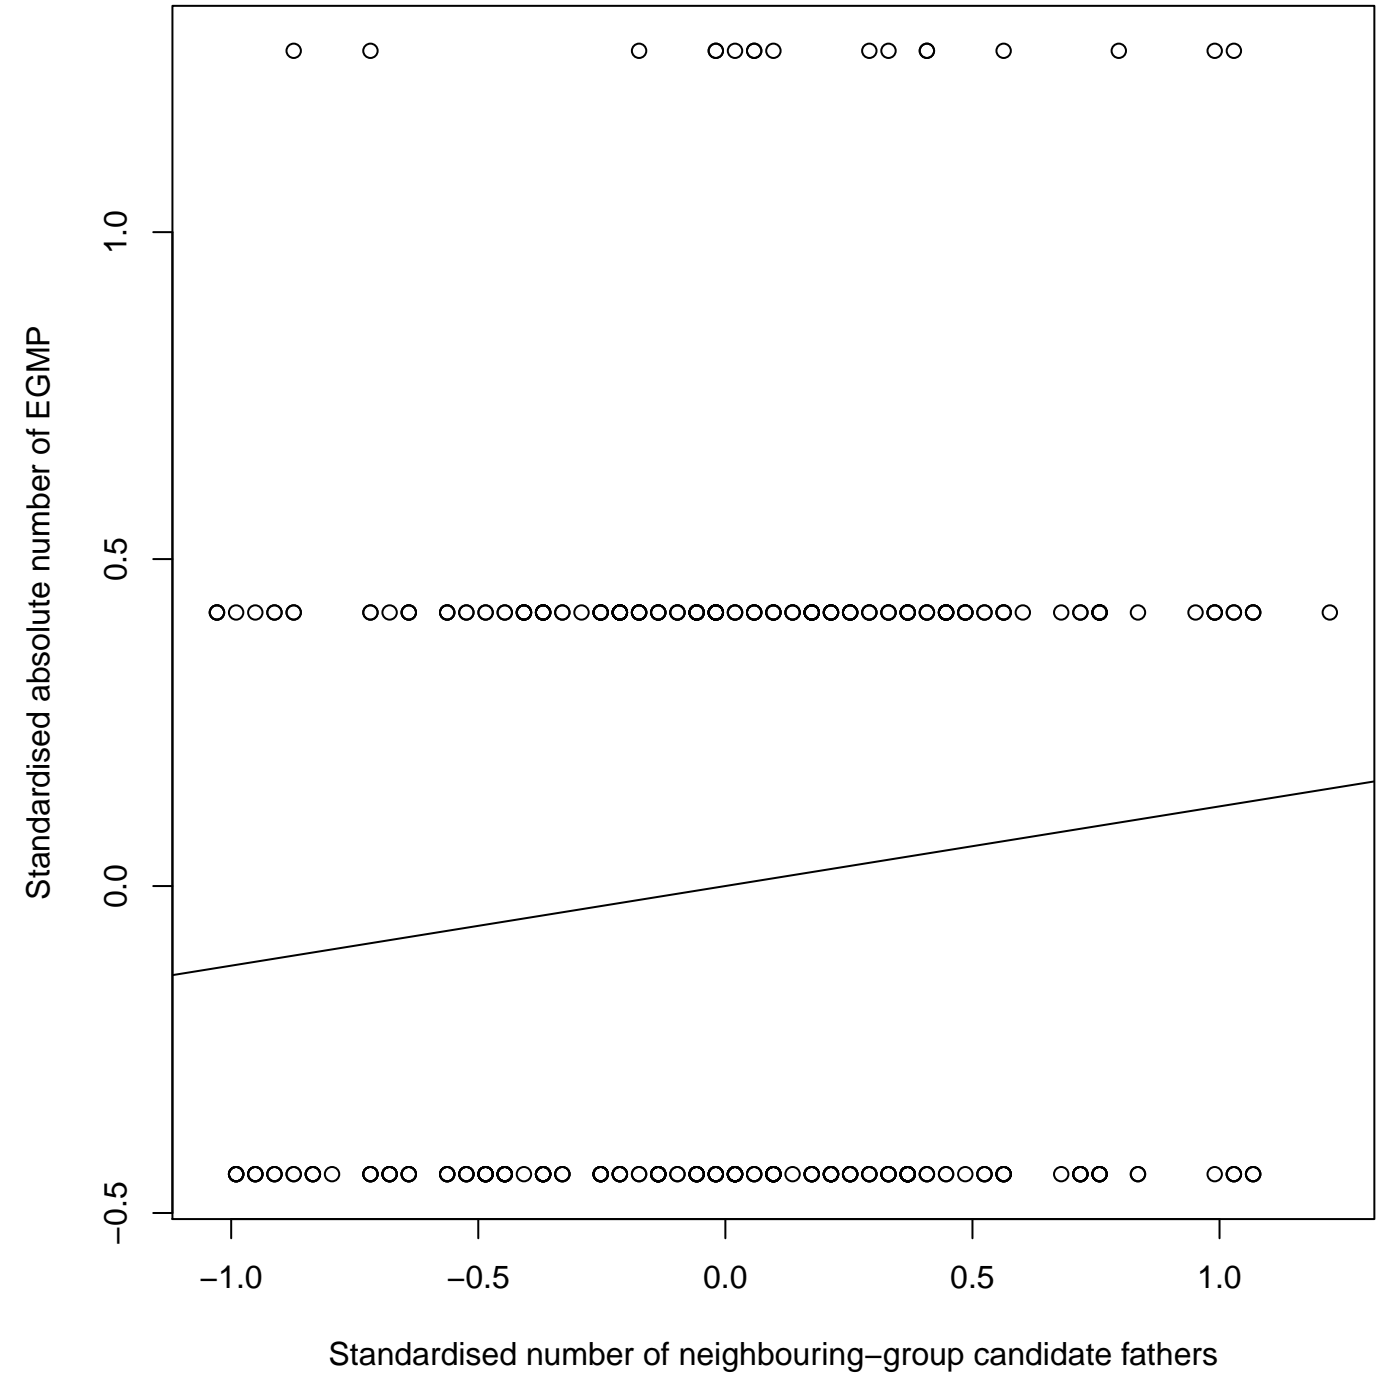

Supplement: jeb0027-2191-sd1.pdf [file jeb0027-2191-sd1.pdf]
